# Supplementary material for: Respiratory Non-Invasive Venous Waveform Analysis for Assessment of Respiratory Distress in Coronavirus Disease 2019 Patients: An Observational Study
Source: PubMed Central journal article supplement — Crit Care Explor. 2021 Oct 1;3(10):e0539. doi: 10.1097/CCE.0000000000000539 (PMC8489896; doi:10.1097/cce.0000000000000539), 2021-10-01
Supplement: cc9-3-e0539-s001.pdf [file cc9-3-e0539-s001.pdf]

|                                                     | COVID-19 POSITIVE<br>(N = 45)            |                                           | COVID-19 NEGATIVE<br>CONTROL<br>(N = 34) | p-value |
|-----------------------------------------------------|------------------------------------------|-------------------------------------------|------------------------------------------|---------|
|                                                     | w/ oxygen support during hospitalization | w/o oxygen support during hospitalization |                                          |         |
| <b>CHARACTERISTIC *†</b>                            |                                          |                                           |                                          |         |
| <b>TOTAL ENROLLED- NO.</b>                          | 50                                       |                                           | 45                                       |         |
| <b>ANALYZED- NO. (%)</b>                            | 45 (90)                                  |                                           | 34 (75)                                  |         |
| <b>TOTAL</b>                                        | 34 (76)                                  | 11 (24)                                   |                                          |         |
| <b>AGE 18-35 YR- NO. (%)</b>                        | 5 (15)                                   | 1 (9)                                     | 1 (3)                                    |         |
| <b>AGE 36- 50 YR- NO. (%)</b>                       | 7 (21)                                   | 4 (36)                                    | 9 (26)                                   |         |
| <b>AGE 51-65 YR- NO. (%)</b>                        | 16 (47)                                  | 6 (5)                                     | 15 (44)                                  |         |
| <b>AGES &gt; 65 YR- NO. (%)</b>                     | 6 (18)                                   | 0 (0)                                     | 9 (26)                                   |         |
| <b>MEDIAN AGE (IQR)- YR</b>                         | 53.5 (46 – 63)                           | 56 (45.5 – 60.5)                          | 56 (48 - 66.4)                           | 0.5648  |
| <b>GENDER</b>                                       |                                          |                                           |                                          | 0.3681  |
| <b>FEMALE- NO. (%)</b>                              | 11 (32)                                  | 5 (45)                                    | 8 (24)                                   |         |
| <b>MALE- NO. (%)</b>                                | 23 (68)                                  | 6 (55)                                    | 26 (76)                                  |         |
| <b>ETHNICITY †</b>                                  |                                          |                                           |                                          | 0.0714  |
| <b>HISPANIC- NO. (%)</b>                            | 5 (15)                                   | 1 (9)                                     | 0 (0)                                    |         |
| <b>NOT HISPANIC- NO. (%)</b>                        | 29 (85)                                  | 10 (91)                                   | 34 (100)                                 |         |
| <b>RACE †</b>                                       |                                          |                                           |                                          |         |
| <b>AMERICA</b>                                      | 0 (0)                                    | 0 (0)                                     | 0 (0)                                    |         |
| <b>INDIAN/ALASKAN NATIVE-- NO. (%)</b>              |                                          |                                           |                                          |         |
| <b>ASIAN- NO. (%)</b>                               | 2 (6)                                    | 0 (0)                                     | 0 (0)                                    | 0.2572  |
| <b>BLACK OR AA- NO. (%)</b>                         | 4 (12)                                   | 4 (36)                                    | 7 (21)                                   | 0.1855  |
| <b>HISPANIC OR LATINO- NO. (%)</b>                  | 5 (15)                                   | 1 (9)                                     | 0 (0)                                    | 0.0714  |
| <b>NATIVE HAWAIIAN OR PACIFIC ISLANDER- NO. (%)</b> | 0 (0)                                    | 0 (0)                                     | 0 (0)                                    |         |
| <b>WHITE- NO. (%)</b>                               | 21 (62)                                  | 5 (45)                                    | 26 (77)                                  | 0.1359  |
| <b>UNKNOWN- NO. (%)</b>                             | 2 (6)                                    | 1 (9)                                     | 1 (3)                                    | 0.6917  |
| <b>MEDIAN BMI (IQR) †</b>                           | 33.22 (28.07 - 36.22)                    | 28.05 (25.05 -31.43)                      | 26.92 (24.96 - 29.91)                    | 0.0102  |
| <b>BMI &gt; 30</b>                                  | 20 (59)                                  | 4 (36)                                    | 6 (18)                                   |         |
| <b>COMORBIDITIES- NO. (%)</b>                       |                                          |                                           |                                          |         |
| <b>HTN</b>                                          | 18 (53)                                  | 6 (55)                                    | 20 (59)                                  | 0.8846  |
| <b>HLD</b>                                          | 9 (26)                                   | 2 (18)                                    | 18 (53)                                  | 0.0300  |
| <b>DIABETES (TYPE 1 &amp; 2)</b>                    | 9 (26)                                   | 3 (27)                                    | 14 (41)                                  | 0.3967  |
| <b>CKD/ESRD</b>                                     | 6 (18)                                   | 0 (0)                                     | 25 (74)                                  | <0.0001 |
| <b>LIVER DISEASE</b>                                | 0 (0)                                    | 2 (18)                                    | 0 (0)                                    | 0.0018  |
| <b>HEART DISEASE</b>                                | 13 (38)                                  | 3 (27)                                    | 1 (3)                                    | 0.0017  |
| <b>PVD</b>                                          | 0 (0)                                    | 0 (0)                                     | 0 (0)                                    |         |
| <b>HISTORY OF SOLID ORGAN TRANSPLANT</b>            | 4 (12)                                   | 0 (0)                                     | 1 (3)                                    | 0.2127  |
| <b>HISTORY OF MALIGNANCY</b>                        | 7 (21)                                   | 1 (9)                                     | 2 (6)                                    | 0.0189  |
| <b>CURRENT CHEMO OR XRT</b>                         | 1 (3)                                    | 1 (9)                                     | 0 (0)                                    | 0.2436  |

|                                                 |               |                    |             |        |
|-------------------------------------------------|---------------|--------------------|-------------|--------|
| OSA                                             | 8 (24)        | 1 (9)              | 0 (0)       | 0.0091 |
| ASTHMA                                          | 5 (15)        | 0 (0)              | 0 (0)       | 0.0292 |
| COPD/COLD                                       | 2 (6)         | 0 (0)              | 0 (0)       | 0.2572 |
| <b>SMOKING STATUS†</b>                          |               |                    |             |        |
| CURRENT SMOKER                                  | 2 (6)         | 2 (18)             | 0 (0)       | 0.0551 |
| FORMER SMOKER                                   | 5 (15)        | 2 (18)             | 13 (38)     | 0.0699 |
| UNKNOWN                                         | 2 (6)         | 0 (0)              | 0 (0)       | 0.2572 |
| NEVER SMOKER                                    | 25 (74)       | 7 (64)             | 21 (62)     | 0.5670 |
| <b>MEDIAN NIVA SCORE AT<br/>ADMISSION (IQR)</b> | 12 (10.5 -14) | 10.5 (9.25 – 12.5) | 12 (9 – 17) | 0.7974 |

**Table 1. Demographic characteristics of enrolled patients\***. Abbreviations: HTN= hypertension; HLD= hyperlipidemia; CKD= chronic kidney disease; ESRD= end stage renal disease; PVD= peripheral vascular disease; OSA= obstructive sleep apnea; COPD= chronic obstructive pulmonary disease; COLD= chronic obstructive lung disease; NIVA= non-invasive venous waveform analysis.

\* Percentages may not equal 100 because of rounding. IQR denotes interquartile range.

† Ethnic group, race, and smoking status reported by patient.

‡ BMI is calculated as weight in kilograms divided by the square of height in meters. BMI is missing from one patient in control list.
