# Supplementary material for: Respiratory Non-Invasive Venous Waveform Analysis for Assessment of Respiratory Distress in Coronavirus Disease 2019 Patients: An Observational Study
Source: PubMed Central journal article supplement — Crit Care Explor. 2021 Oct 1;3(10):e0539. doi: 10.1097/CCE.0000000000000539 (PMC8489896; doi:10.1097/cce.0000000000000539), 2021-10-01
Supplement: cc9-3-e0539-s004.pdf [file cc9-3-e0539-s004.pdf]

Subjects Needing O<sub>2</sub>

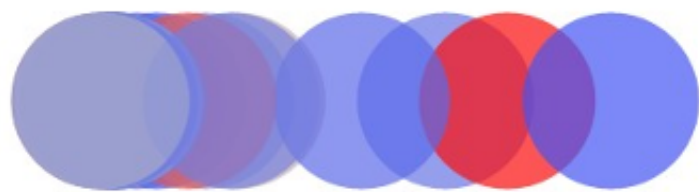

| NIVA   | Color       |
|--------|-------------|
| 6.000  | Dark Blue   |
| 12.000 | Medium Blue |
| 18.000 | Light Blue  |
| 24.000 | Light Red   |
| 30.000 | Dark Red    |

Subjects Not Needing O<sub>2</sub>

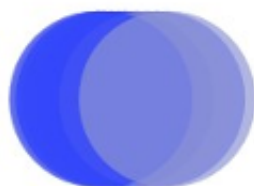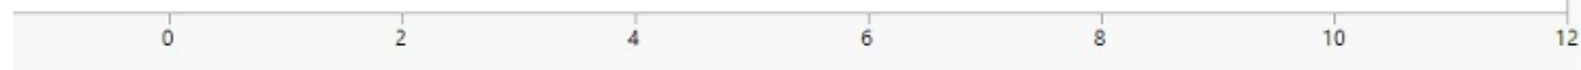

**RIVA-RI**
