# Supplementary figures and images for: Respiratory Non-Invasive Venous Waveform Analysis for Assessment of Respiratory Distress in Coronavirus Disease 2019 Patients: An Observational Study
Source: PubMed Central journal article supplement — Crit Care Explor. 2021 Oct 1;3(10):e0539. doi: 10.1097/CCE.0000000000000539 (PMC8489896; doi:10.1097/cce.0000000000000539), 2021-10-01

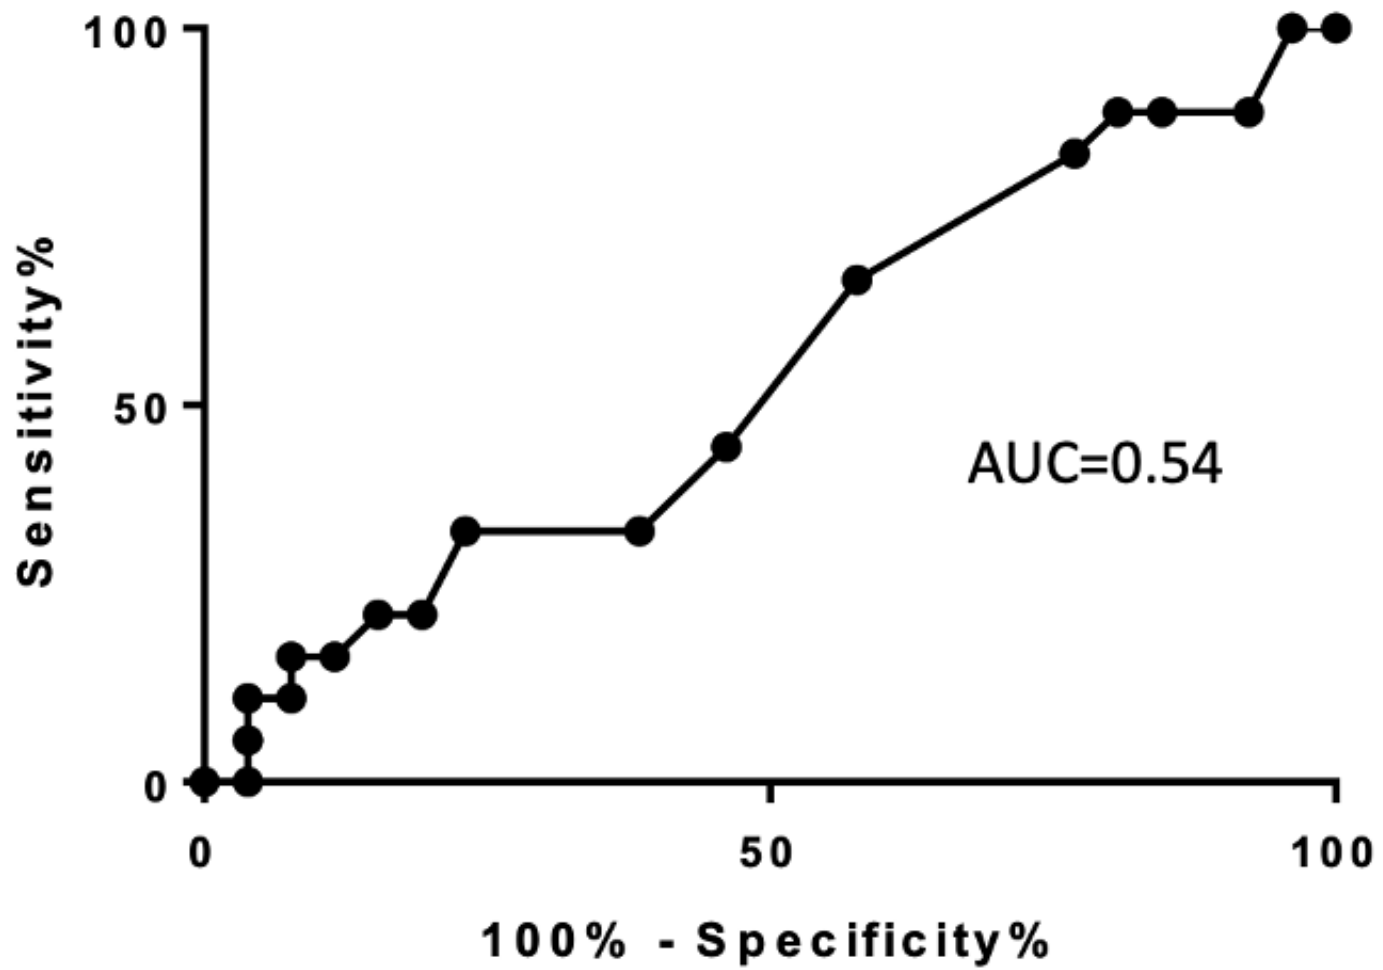

Supplement: cc9-3-e0539-s002.pdf [file cc9-3-e0539-s002.pdf]

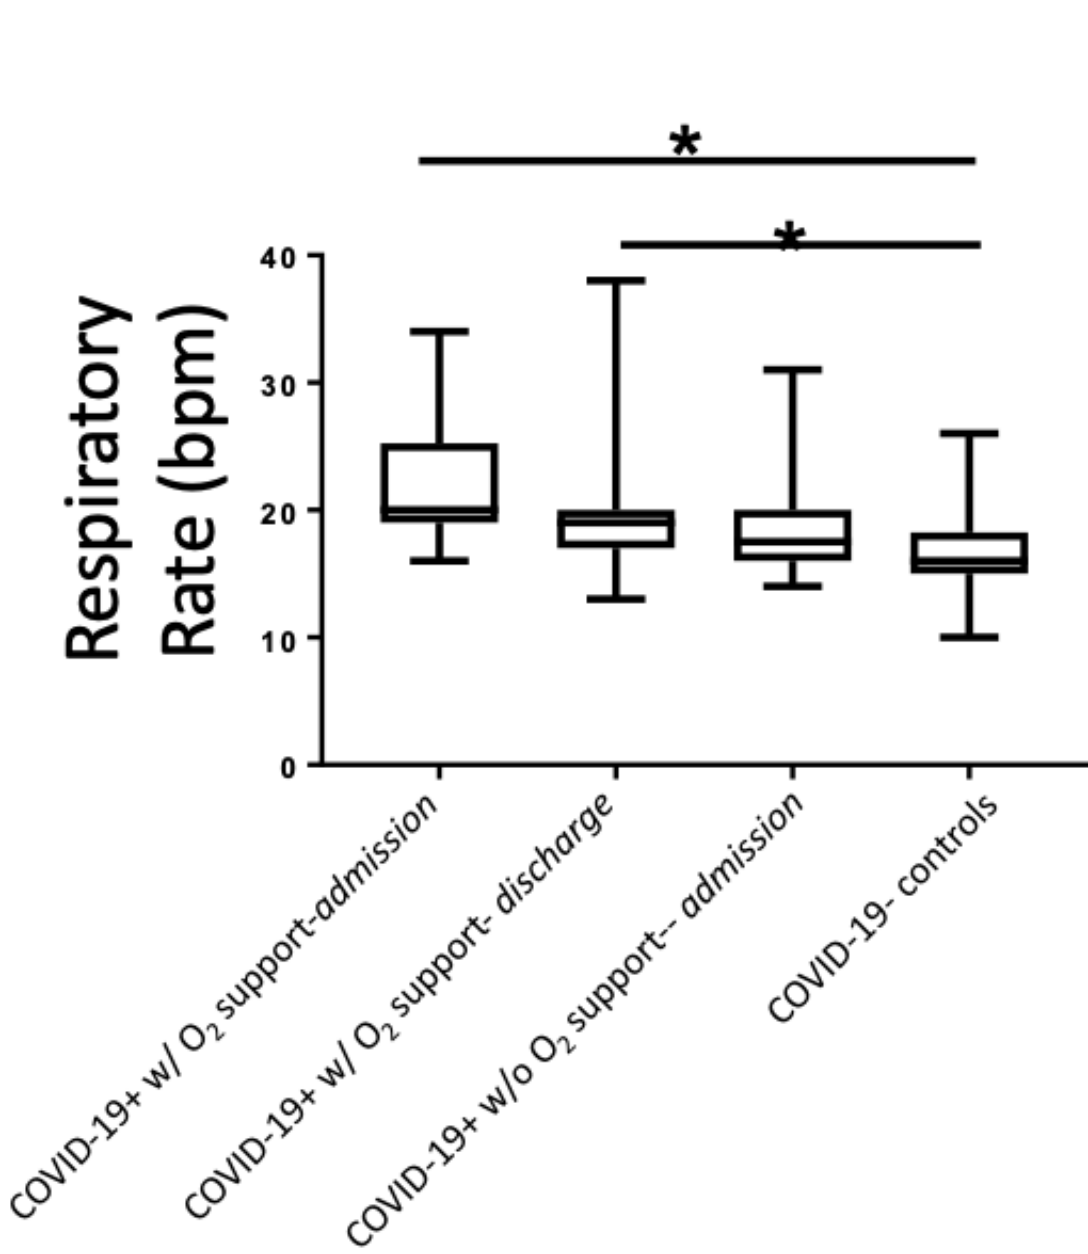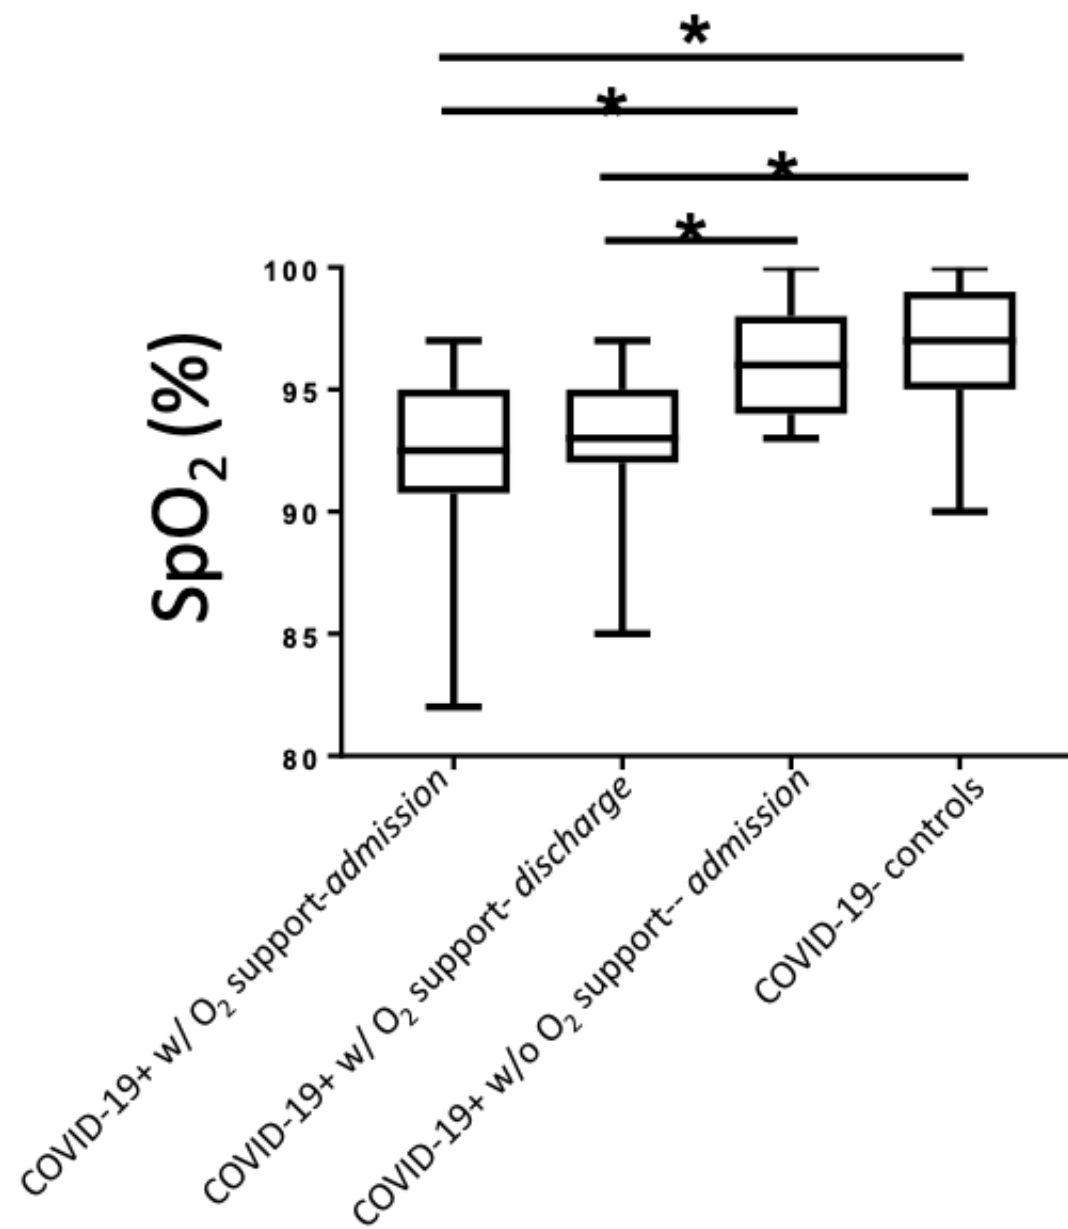

Supplement: cc9-3-e0539-s003.pdf [file cc9-3-e0539-s003.pdf]
